# Supplementary material
Source: PubMed Central journal article supplement (PMC545494)

| Gene structure                                                                     | Priority Score |
|------------------------------------------------------------------------------------|----------------|
| 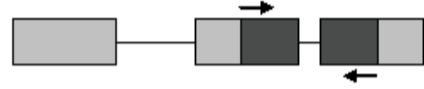 | 85             |
|  | 80             |
|  | 45             |

Supplement: pnas_102_5_1566__1.pdf [file pnas_102_5_1566__1.pdf]

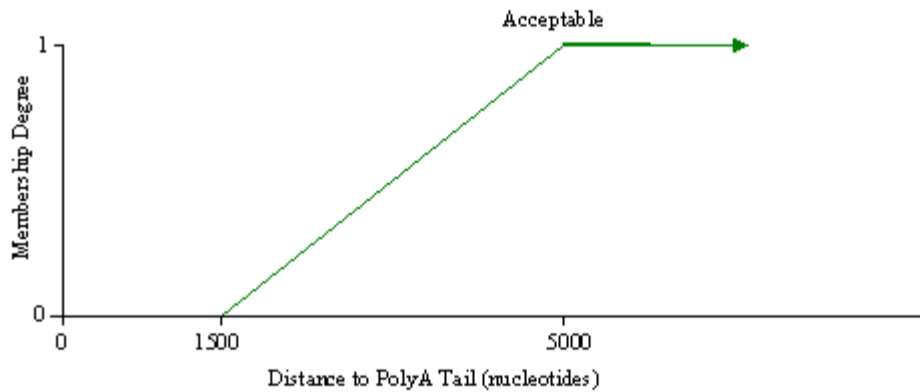

Supplement: pnas_102_5_1566__4.pdf [file pnas_102_5_1566__4.pdf]
